# Supplementary material for: xopAC-triggered Immunity against Xanthomonas Depends on Arabidopsis Receptor-Like Cytoplasmic Kinase Genes PBL2 and RIPK
Source: PubMed Central journal article supplement (PMC3739749; doi:10.1371/journal.pone.0073469), 2013-08-09
Supplement: pone.0073469.s002.pdf [file pone.0073469.s002.pdf]

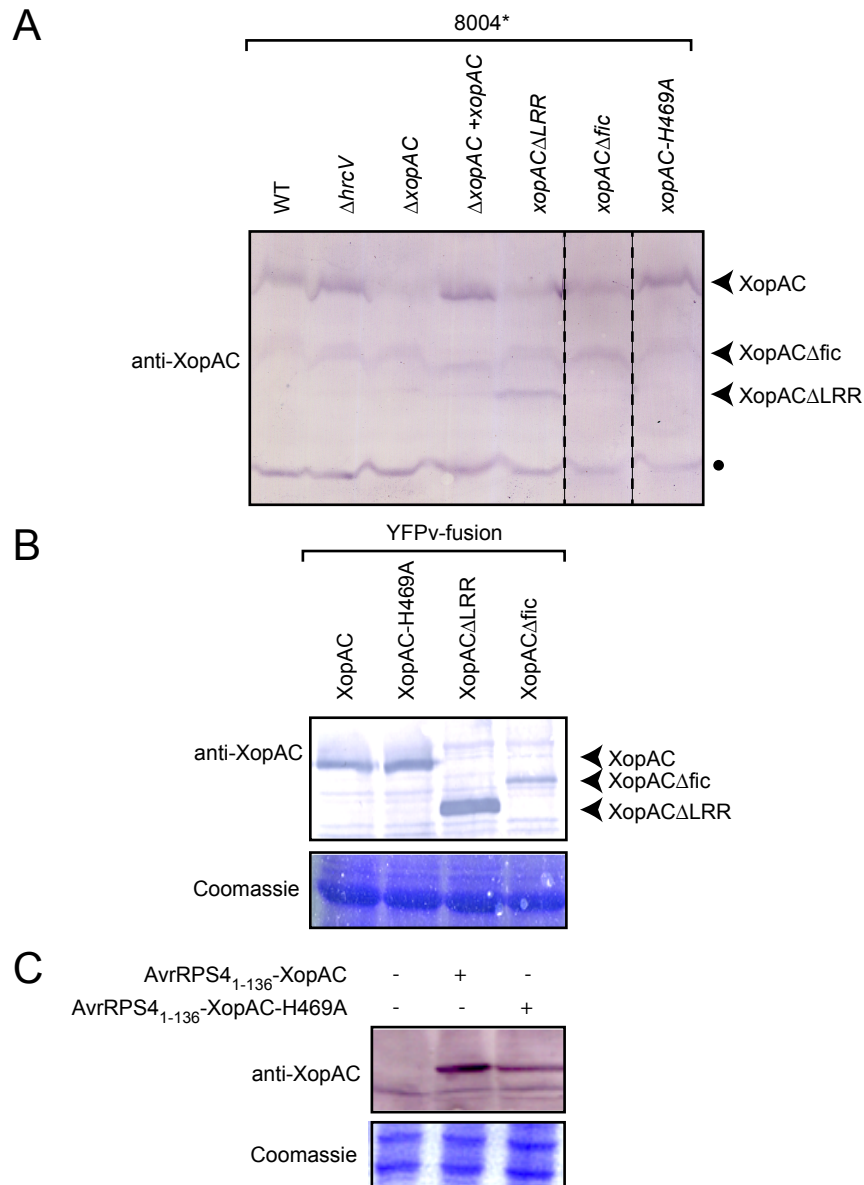

**Supporting Figure S2: Accumulation and stability of XopAC variants expressed in *Xcc* 8004\*, *Pst* DC3000 and *N. benthamiana*.**

Total protein extracts were separated by SDS-PAGE and analysed by immunoblot using the anti-XopAC antibody. (A) Derivatives of *Xcc* strain 8004\* (*hrpG*\*) expressing *xopAC* variants grown in Moka medium. Black dot indicates an unspecific band used to compare loading between lanes. (B) YFPv-XopAC fusions expressed in *N. benthamiana* leaves using *Agrobacterium*-mediated transformation. Arrows indicate the position of full-length XopAC and its  $\Delta LRR$  and  $\Delta fic$  variants. (C) *Pst* DC3000 expressing XopAC fusions to the AvrRps4 N terminus. Coomassie stained portions of the gel are shown to compare sample loading between lanes.
