# Supplementary material for: xopAC-triggered Immunity against Xanthomonas Depends on Arabidopsis Receptor-Like Cytoplasmic Kinase Genes PBL2 and RIPK
Source: PubMed Central journal article supplement (PMC3739749; doi:10.1371/journal.pone.0073469), 2013-08-09
Supplement: pone.0073469.s003.pdf [file pone.0073469.s003.pdf]

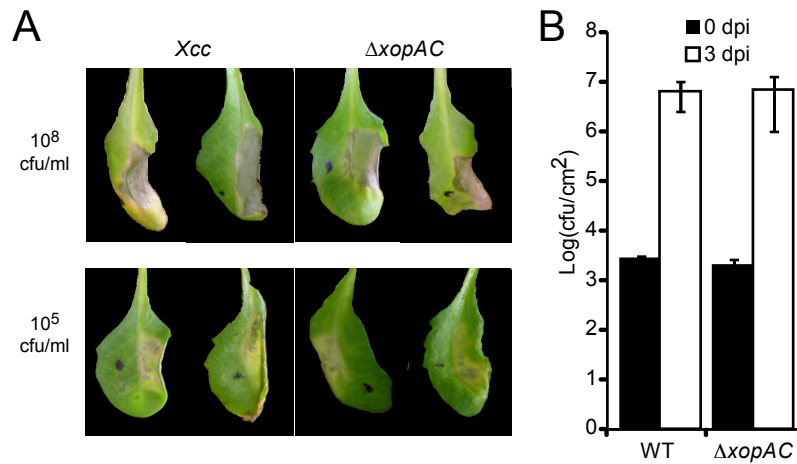

**Supporting Figure S3. Symptom development and *in planta* growth of *Xcc* strain 8004 infiltrated into leaves of *Arabidopsis* ecotype Kas are not affected by *XopAC*.**

(A) Wild-type *Xcc* strain 8004 and 8004 $\Delta xopAC$  were force-infiltrated at bacterial densities of  $10^5$  and  $10^8$  cfu/ml in four-weeks-old *Arabidopsis* plants ecotype Kas. Pictures were taken at 5 days post-inoculation. (B) *Xcc* strains were infiltrated into leaves of *Arabidopsis* ecotype Kas at a bacterial density of  $10^5$  cfu/ml. *In planta* bacterial populations in the inoculated areas were determined 0 and 3 days post-inoculation (dpi) and expressed as log (cfu/cm<sup>2</sup>). Standard deviations were calculated on three independent experiments: for each experiment, three samples of two leaf discs from different plants per strain. No statistically significant groups could be identified using a Wilcoxon test ( $P < 0.05$ ).
