# Supplementary material for: xopAC-triggered Immunity against Xanthomonas Depends on Arabidopsis Receptor-Like Cytoplasmic Kinase Genes PBL2 and RIPK
Source: PubMed Central journal article supplement (PMC3739749; doi:10.1371/journal.pone.0073469), 2013-08-09
Supplement: pone.0073469.s005.pdf [file pone.0073469.s005.pdf]

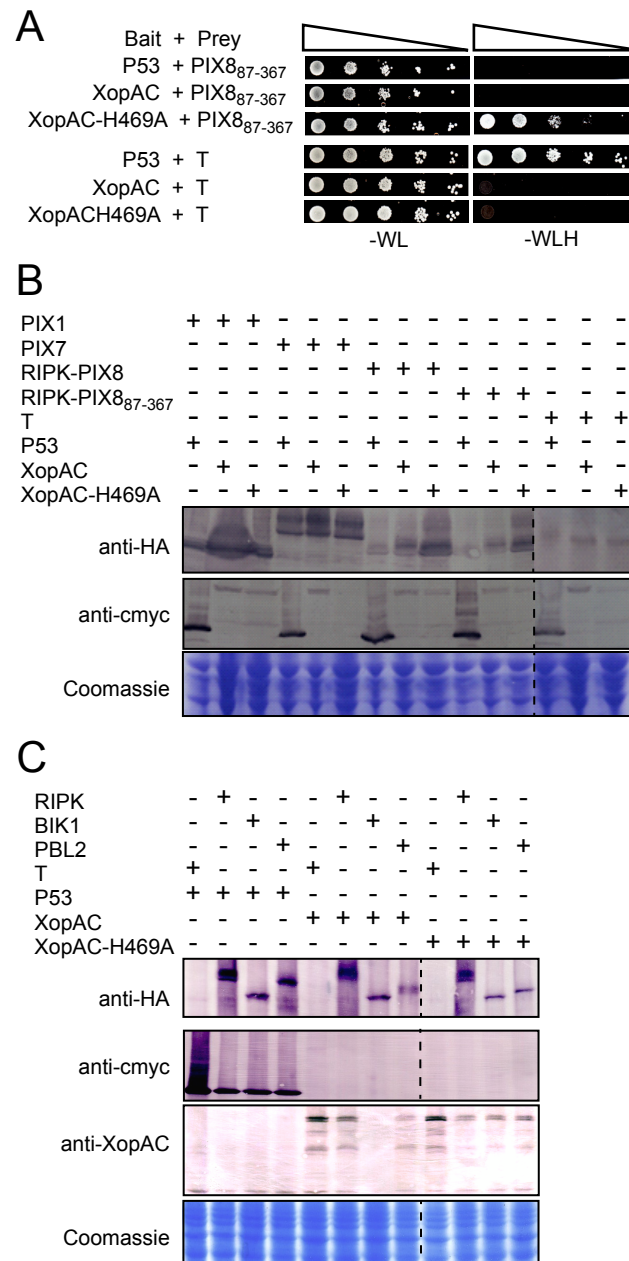

**Supporting Figure S5. XopAC-H469A interacts with the PIX8 kinase domain in a yeast two-hybrid assay.**

(A) Yeast two-hybrid interaction test between XopAC or its mutant allele H469A as baits and PIX8<sub>87-367</sub> and T antigen as preys. The T antigen is a known interactor of P53 and was used as specificity control for the baits. Ten-fold serial dilutions of yeast transformants were spotted from left to the right on minimal medium (-WL) and medium without histidine (-WLH) which is used to visualize prey/bait interaction. Pictures were taken 4 days after spotting. (B, C) Accumulation of bait and prey proteins described in panel A and Figure 4 was verified by immunoblot analysis of total yeast protein extracts using the anti-HA, anti-XopAC and anti-cmyc antibodies. Equal protein loading was tested by coomassie staining of the SDS-PAGE.
