# Supplementary material for: xopAC-triggered Immunity against Xanthomonas Depends on Arabidopsis Receptor-Like Cytoplasmic Kinase Genes PBL2 and RIPK
Source: PubMed Central journal article supplement (PMC3739749; doi:10.1371/journal.pone.0073469), 2013-08-09
Supplement: pone.0073469.s006.pdf [file pone.0073469.s006.pdf]

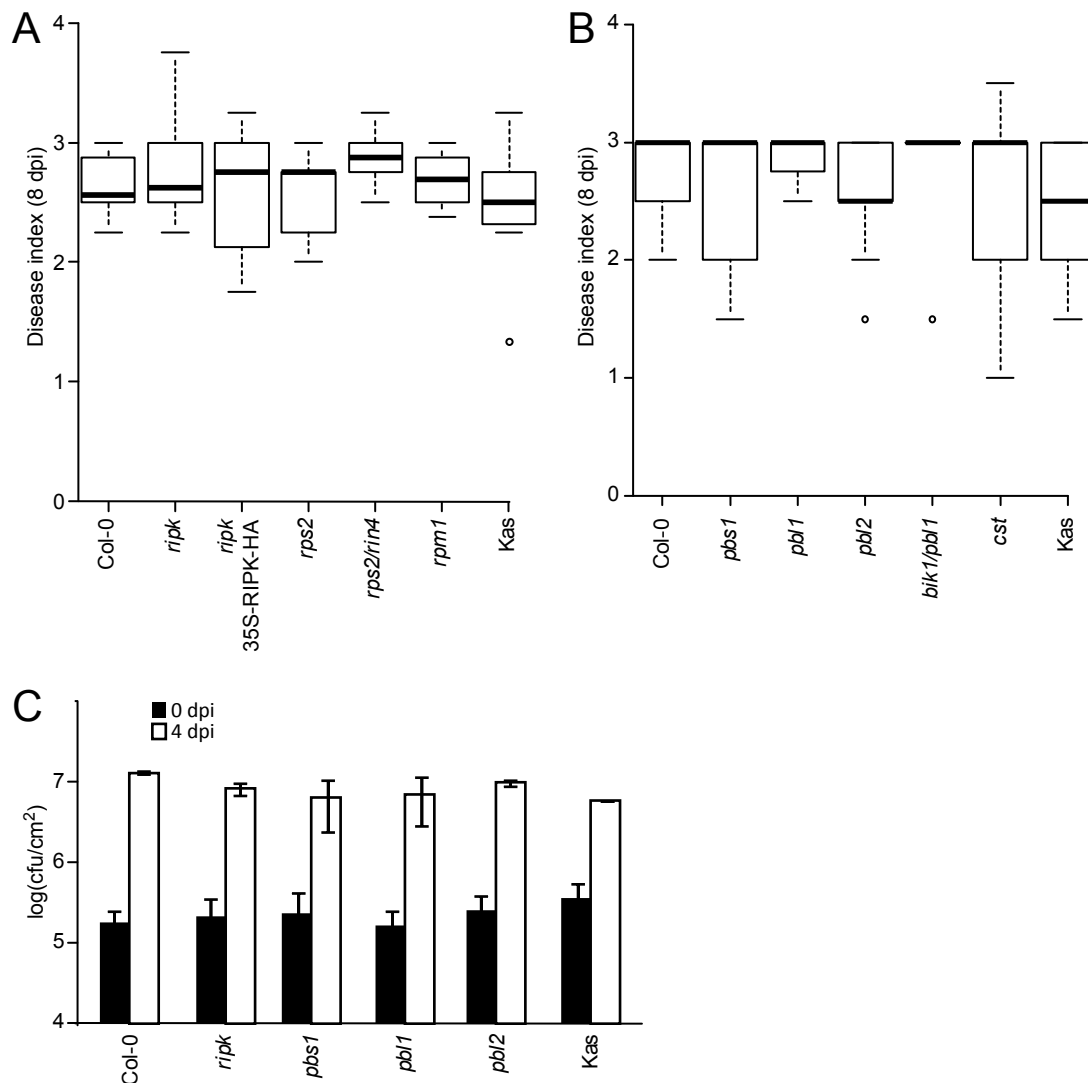

**Supporting Figure S6. Pathogenicity and *in planta* growth of strain 8004 $\Delta$ xopAC on Col-0 mutants and transgenics inoculated by piercing in the central leaf vein.**

A boxplot representation of disease index scores is shown: middle bar = median; box limit = upper and lower quartile; extremes = Min and Max values. Kas was used as a susceptible control. Mutants in genes coding for the RIPK/RIN4/RPM1 complex (A) and other RLCK (B) were tested. Disease indexes were scored 8 days post-inoculation: 0-1 no symptoms; 1-2 weak chlorosis, 2-3 strong chlorosis; 3-4 necrosis. N=3. Each time at least 4 plants were inoculated on at least 3 leaves. Statistical groups were determined using a Tukey HSD test ( $P < 0.001$ ) and indicated by a letter. (C) A bacterial suspension ( $10^5$  cfu/ml) of *Xcc* strain 8004 $\Delta$ xopAC was inoculated by piercing leaves of Col-0 mutants and transgenics. *In planta* bacterial populations in the inoculated areas were determined 0 and 4 days post-inoculation and expressed as log (cfu/cm<sup>2</sup>). Standard deviations were calculated on two independent experiments: for each experiment, three samples of two leaf disc from different plants per strain. No statistically significant groups could be identified using a Wilcoxon test ( $P < 0.05$ ).
