# Supplementary material for: xopAC-triggered Immunity against Xanthomonas Depends on Arabidopsis Receptor-Like Cytoplasmic Kinase Genes PBL2 and RIPK
Source: PubMed Central journal article supplement (PMC3739749; doi:10.1371/journal.pone.0073469), 2013-08-09
Supplement: pone.0073469.s007.pdf [file pone.0073469.s007.pdf]

**Supporting Table S1: Strains and plasmids used in this study**

| Strains and plasmids                                | Features                                                                                                                                                                                                                    | Reference or source          |
|-----------------------------------------------------|-----------------------------------------------------------------------------------------------------------------------------------------------------------------------------------------------------------------------------|------------------------------|
| <i>Xanthomonas campestris</i> pv. <i>campestris</i> |                                                                                                                                                                                                                             |                              |
| 8004                                                | Wild-type strain, Rif <sup>r</sup>                                                                                                                                                                                          | [1]                          |
| 8004Δ <i>xopAC</i>                                  | 8004 derivative, carries a <i>xopAC</i> deletion, Rif <sup>r</sup>                                                                                                                                                          | M. Chabannes, unpublished    |
| 8004 <i>xopAC</i> ΔLRR                              | 8004 derivative, carries a deletion of XopAC LRR domain, Rif <sup>r</sup>                                                                                                                                                   | This study                   |
| 8004 <i>xopAC</i> ΔFic                              | 8004 derivative, carries a deletion of XopAC Fic domain, Rif <sup>r</sup>                                                                                                                                                   | This study                   |
| 8004 <i>xopAC</i> -H469A                            | 8004 derivative, carries the XopAC H469A mutation, Rif <sup>r</sup>                                                                                                                                                         | This study                   |
| 8004*                                               | 8004 derivative, carries a <i>hrpG</i> * mutation; constitutive expression of <i>hrpG</i> regulon, Rif <sup>r</sup>                                                                                                         | This study                   |
| 8004* <i>hrcV</i>                                   | 8004* derivative, carries a <i>hrcV</i> deletion, Rif <sup>r</sup>                                                                                                                                                          | This study                   |
| <i>Ralstonia solanacearum</i>                       |                                                                                                                                                                                                                             |                              |
| GMI1000                                             | Wild-type strain                                                                                                                                                                                                            | [2]                          |
| GMI1694                                             | GMI1000 <i>hrcV</i> ::Ω, Spc <sup>r</sup>                                                                                                                                                                                   | [3]                          |
| <i>Pseudomonas syringae</i> pv. <i>tomato</i>       |                                                                                                                                                                                                                             |                              |
| DC3000                                              | Wild-type strain, Rif <sup>r</sup>                                                                                                                                                                                          | [4]                          |
| <i>Agrobacterium tumefaciens</i>                    |                                                                                                                                                                                                                             |                              |
| C58C1                                               | Wild-type strain, Rif <sup>r</sup>                                                                                                                                                                                          | -                            |
| GV3101 pMP90                                        | Wild-type, Rif <sup>r</sup> , Gent <sup>r</sup>                                                                                                                                                                             | -                            |
| <i>Escherichia coli</i>                             |                                                                                                                                                                                                                             |                              |
| TG1                                                 | <i>supE thi-1 Δ(lac-proAB) Δ(mcrB-hsdSM)5 (r<sub>k</sub><sup>-</sup> m<sub>k</sub><sup>-</sup>) [F' traD36 proAB lacI<sup>q</sup>ZΔM15]</i>                                                                                 | Stratagene                   |
| DH5α                                                | <i>F' recA lacZ DM15</i>                                                                                                                                                                                                    | Bethesda Research Laboratory |
| BL21 (DE3) pLysS                                    | <i>F- ompT hsdS<sub>B</sub> (r<sub>B</sub><sup>-</sup> m<sub>B</sub><sup>-</sup>) gal dcm (DE3) pLysS, Cm<sup>r</sup></i>                                                                                                   | Invitrogen                   |
| <i>Saccharomyces cerevisiae</i>                     |                                                                                                                                                                                                                             |                              |
| AH109                                               | <i>MATa, trp1-901, leu2-3, 112, ura3-52, his3-200, gal4Δ, gal80Δ, LYS2 :: GAL1<sub>UAS</sub>-GAL1<sub>TATA</sub>-HIS3, GAL2<sub>UAS</sub>-GAL2<sub>TATA</sub>-ADE2, URA3 :: MEL1<sub>UAS</sub>-MEL1<sub>TATA</sub>-lacZ</i> | Clontech                     |
| NMY32                                               | <i>MATa his3Δ200 trp1-901 leu2-3,112 (lexAop)<sub>8</sub>-ADE2 LYS2:::(lexAop)<sub>4</sub>-HIS3 URA3:::(lexAop)<sub>8</sub>-lacZ GAL4)</i>                                                                                  | Dual Systems Biotech         |
| Plasmids                                            |                                                                                                                                                                                                                             |                              |
| pRK2073                                             | Helper plasmid, Spc <sup>r</sup> , Strep <sup>r</sup>                                                                                                                                                                       | [5]                          |
| pCZ917                                              | pFAJ1700 derivative with the pTaq Promoter and T7 Terminator, <i>lacI</i> , Tet <sup>r</sup> ,                                                                                                                              | [6]                          |
| pCZ917- <i>xopAC</i> <sub>A</sub>                   | pCZ917 with the <i>xopAC</i> <sub>8004</sub> promoter and gene, Tet <sup>r</sup>                                                                                                                                            | M. Chabannes, unpublished    |
| pΔ13                                                | Goldengate cloning-compatible derivative of suicide plasmid pK18mobsacB, Kan <sup>r</sup> , Suc <sup>s</sup>                                                                                                                | L. Noël, unpublished         |
| pΔ13- <i>xopAC</i> ΔLRR                             | pK18mobsacB derivative, for the deletion of <i>xopAC</i> <sub>8004</sub> LRR, Kan <sup>r</sup> , Suc <sup>s</sup>                                                                                                           | This study                   |
| pΔ13- <i>xopAC</i> Δfic                             | pK18mobsacB derivative, for the deletion of <i>xopAC</i> <sub>8004</sub> fic, Kan <sup>r</sup> , Suc <sup>s</sup>                                                                                                           | This study                   |

|                               |                                                                                                                |                           |
|-------------------------------|----------------------------------------------------------------------------------------------------------------|---------------------------|
| pΔ13-xopAC-H469A              | pΔ13 derivative, for XopAC <sub>8004</sub> H469A substitution, Kan <sup>r</sup> , Suc <sup>s</sup>             | This study                |
| pΔ13-hrpG*                    | pK18mobsacB derivative, for HrpG <sub>8004</sub> E44K substitution, Kan <sup>r</sup> , Suc <sup>s</sup>        | This study                |
| pDONR207                      | Gateway Donor vector for entry clone construction by BP recombination, Gent <sup>r</sup> , Cm <sup>r</sup>     | Invitrogen                |
| pENTRY-xopAC                  | pDONR207 derivative, XopAC <sub>8004</sub> ORF cloned by BP reaction, Gent <sup>r</sup>                        | This study                |
| pENTRY-xopACΔLRR              | pDONR207 derivative, XopACΔLRR <sub>8004</sub> ORF cloned by BP reaction, Gent <sup>r</sup>                    | This study                |
| pENTRY-xopACΔfic              | pDONR207 derivative, XopACΔfic <sub>8004</sub> ORF cloned by BP reaction, Gent <sup>r</sup>                    | This study                |
| pENTRY-xopAC-H469A            | pDONR207 derivative, XopAC-H469A <sub>8004</sub> ORF cloned by BP reaction, Gent <sup>r</sup>                  | This study                |
| pENTRY-PIX1                   | pDONR207 derivative, PIX1 ORF cloned by BP reaction, Gent <sup>r</sup>                                         | This study                |
| pENTRY-PIX7                   | pDONR207 derivative, PIX7 ORF cloned by BP reaction, Gent <sup>r</sup>                                         | This study                |
| pENTRY-PIX8                   | pDONR207 derivative, PIX8 ORF cloned by BP reaction, Gent <sup>r</sup>                                         | This study                |
| pENTRY-PIX8 <sub>87-367</sub> | pDONR207 derivative, PIX8 <sub>87-367</sub> ORF cloned by BP reaction, Gent <sup>r</sup>                       | This study                |
| pDEST17                       | His-GW, Amp <sup>r</sup> , Cm <sup>r</sup>                                                                     | Invitrogen                |
| pDEST17-xopAC                 | IPTG-inducible expression of His6-XopAC, Amp <sup>r</sup>                                                      | This study                |
| pGADT7-GW                     | Gateway-compatible prey vector Gal4-AD-HA-GW, Amp <sup>r</sup> , Cm <sup>r</sup> , Leu <sup>+</sup>            | L. Deslandes, unpublished |
| pGADT7-PIX1                   | Prey vector Gal4-AD-HA-PIX1, Amp <sup>r</sup> , Leu <sup>+</sup>                                               | This study                |
| pGADT7-PIX7                   | Prey vector Gal4-AD-HA-PIX7, Amp <sup>r</sup> , Leu <sup>+</sup>                                               | This study                |
| pGADT7-PIX8                   | Prey vector Gal4-AD-HA-PIX8, Amp <sup>r</sup> , Leu <sup>+</sup>                                               | This study                |
| pGADT7-PIX8 <sub>87-367</sub> | Prey vector Gal4-AD-HA-PIX8 <sub>87-367</sub> , Amp <sup>r</sup> , Leu <sup>+</sup>                            | This study                |
| pGBKT7-GW                     | Gateway-compatible bait vector, Gal4-BD-myc-GW, Kan <sup>r</sup> , Cm <sup>r</sup> , Trp <sup>+</sup>          | L. Deslandes, unpublished |
| pGBKT7-xopAC                  | Gateway-compatible bait vector, Gal4-BD-myc-XopAC, Kan <sup>r</sup> , Trp <sup>+</sup>                         | This study                |
| pGBKT7-xopAC-H469A            | Gateway-compatible bait vector, Gal4-BD-myc-XopAC-H469A, Kan <sup>r</sup> , Trp <sup>+</sup>                   | This study                |
| pEDV6                         | pAvrRPS4::AvrRPS4 <sub>1-136</sub> -GW-HA, Gen <sup>r</sup> , Cm <sup>r</sup>                                  | [7]                       |
| pEDV6-xopAC                   | pEDV6 derivative, pAvrRPS4::AvrRPS4 <sub>1-136</sub> -XopAC <sub>8004</sub> -HA fusion, Gen <sup>r</sup>       | This study                |
| pEDV6-xopAC-H469A             | pEDV6 derivative, pAvrRPS4::AvrRPS4 <sub>1-136</sub> -XopAC <sub>8004</sub> -H469A-HA fusion, Gen <sup>r</sup> | This study                |
| pNP269                        | pRC derivative [8], pGALA7-GW-HA, Amp <sup>r</sup> , Kan <sup>r</sup> , Gen <sup>r</sup> , Cm <sup>r</sup>     | N. Peeters, unpublished   |
| pNP269-xopAC                  | pNP269 derivative, pGALA7-XopAC-HA, Amp <sup>r</sup> , Kan <sup>r</sup> , Gen <sup>r</sup>                     | This study                |
| pNP269-xopAC-H469A            | pNP269 derivative, pGALA7-XopAC-H469A-HA, Amp <sup>r</sup> , Kan <sup>r</sup> , Gen <sup>r</sup>               | This study                |
| pBin19-35S-YFPv-GW            | p35S::YFPv-GW, Tet <sup>r</sup> , Kan <sup>r</sup> , Cm <sup>r</sup>                                           | S. Rivas, unpublished     |
| pBin19-YFPv-xopAC             | p35S::YFPv-xopAC, Tet <sup>r</sup> , Kan <sup>r</sup>                                                          | This study                |
| pBin19-YFPv-xopACΔLRR         | p35S::YFPv-xopACΔLRR, Tet <sup>r</sup> , Kan <sup>r</sup>                                                      | This study                |
| pBin19-YFPv-xopACΔfic         | p35S::YFPv-xopACΔfic, Tet <sup>r</sup> , Kan <sup>r</sup>                                                      | This study                |
| pBin19-YFPv-xopAC-H469A       | p35S::YFPv-xopAC-H469A, Tet <sup>r</sup> , Kan <sup>r</sup>                                                    | This study                |

## References

1. Daniels MJ, Barber CE, Turner PC, Sawczyc MK, Byrde RJ, et al. (1984) Cloning of genes involved in pathogenicity of *Xanthomonas campestris* pv. *campestris* using the broad host range cosmid pLAFR1. *The EMBO journal* 3: 3323-3328.
2. Boucher CA, Van Gijsegem F, Barberis PA, Arlat M, Zischek C (1987) *Pseudomonas solanacearum* genes controlling both pathogenicity on tomato and hypersensitivity on tobacco are clustered. *Journal of bacteriology* 169: 5626-5632.
3. Cunnac S, Occhialini A, Barberis P, Boucher C, Genin S (2004) Inventory and functional analysis of the large Hrp regulon in *Ralstonia solanacearum*: identification of novel effector proteins translocated to plant host cells through the type III secretion system. *Molecular microbiology* 53: 115-128.
4. Cuppels DA (1986) Generation and Characterization of Tn5 Insertion Mutations in *Pseudomonas syringae* pv. *tomato*. *Applied and environmental microbiology* 51: 323-327.
5. Leong SA, Ditta GS, Helinski DR (1982) Heme biosynthesis in *Rhizobium*. Identification of a cloned gene coding for delta-aminolevulinic acid synthetase from *Rhizobium meliloti*. *The Journal of biological chemistry* 257: 8724-8730.
6. Boulanger A, Dejean G, Lautier M, Glories M, Zischek C, et al. (2010) Identification and regulation of the N-acetylglucosamine utilization pathway of the plant pathogenic bacterium *Xanthomonas campestris* pv. *campestris*. *Journal of bacteriology* 192: 1487-1497.
7. Fabro G, Steinbrenner J, Coates M, Ishaque N, Baxter L, et al. (2011) Multiple candidate effectors from the oomycete pathogen *Hyaloperonospora arabidopsidis* suppress host plant immunity. *PLoS pathogens* 7: e1002348.
8. Monteiro F, Sole M, van Dijk I, Valls M (2012) A chromosomal insertion toolbox for promoter probing, mutant complementation, and pathogenicity studies in *Ralstonia solanacearum*. *Molecular plant-microbe interactions : MPMI* 25: 557-568.
