# Supplementary material for: xopAC-triggered Immunity against Xanthomonas Depends on Arabidopsis Receptor-Like Cytoplasmic Kinase Genes PBL2 and RIPK
Source: PubMed Central journal article supplement (PMC3739749; doi:10.1371/journal.pone.0073469), 2013-08-09
Supplement: pone.0073469.s008.pdf [file pone.0073469.s008.pdf]

**Supporting Table S2: Oligonucleotides used in this study.**

| Name  | Sequence (5'-3') <sup>a</sup>                                    |
|-------|------------------------------------------------------------------|
| LN202 | CTTTTCAGACGAACTCAAATTGCTGCGCTGCCTG                               |
| LN203 | CAGGCAGCGCAGCAATTTGAGTTCGTCTGAAAAG                               |
| LN251 | TTTGGTCTCAAGGTGATCATGCCGGGCTCTCTGAAGG                            |
| LN252 | TTTGGTCTCACTTGCAGCTCAGCAAGCTGCGGTGCGATTG                         |
| LN433 | AGCGCTTGGTCAGTCTGGCTCCTTTTCGATGACGCAAATG                         |
| LN434 | CATTTGCGTCATCGAAAGGAGCCAGACTGACCAAGCGCT                          |
| LN436 | TTTGGTCTCAAGGTCAAGGTTGTCTACCAAGCTTCAG                            |
| LN439 | TTTGGTCTCATTTTCGGGCGGAGGGTACCGACTC                               |
| LN442 | TTTGGTCTCACTTGCAGCCGAATCGGGCAGCGAAAAGGTG                         |
| LN443 | TTTGGTCTCAGAAACCCTGAAAGACGAAATGGCGAAG                            |
| LN608 | A <u>ACTGCAGAT</u> GGATAAAAAATCTTAATTTGTG                        |
| LN609 | A <u>ACCCGGGCTACTGGTGAACCTGGTTCATAAC</u>                         |
| LN714 | <u>GGGGACAAGTTTGTACAAAAAAGCAGGCTTCATGGGTTCTTGCTTCAGTTCTC</u>     |
| LN715 | <u>GGGGACCACTTTGTACAAGAAAGCTGGGTCCACAAGGTGCCTGCCAAAAGG</u>       |
| LN716 | <u>GGGGACAAGTTTGTACAAAAAAGCAGGCTTCATGGGTAATTGTTTAGATTCATCAG</u>  |
| LN717 | <u>GGGGACCACTTTGTACAAGAAAGCTGGGTCTCTTACACGAGGAGATTGAGTG</u>      |
| MC4   | AGCTTGGTAGGACAAAGCTTGTCCCGCATCTAAGCA                             |
| MC5   | GATGCGGGACAAGCTTTGTCTACCAAGCTTCAGCGCT                            |
| MC8   | TTCACCAACGGGCGCCGATCAAGTGTGATCGGTGC                              |
| MC9   | ATCACACTTGATCGGCCGCCGTTGGTGAAGCAAGC                              |
| MC12  | <u>AAAAAGCAGGCTCGATGGATAAAAAATCTTAATTT</u>                       |
| MC13  | <u>AGAAAGCTGGGTAGCATTGAGGCGTGTAGGT</u>                           |
| MC18  | <u>GGGGACAAGTTTGTACAAAAAAGCAGGCT</u>                             |
| MC19  | <u>GGGGACCACTTTGTACAAGAAAGCTGGGT</u>                             |
| EG3   | CGACGTTTCGATCCAGAAACCAGACAGAGGTTG                                |
| EG4   | CAACCTCTGTCTGGTTTCTGGATCGAACGTCG                                 |
| EG5   | TTTGGTCTCAAGGTGGATAAAAAATCTTAATTTGTGGG                           |
| EG6   | TTTGGTCTCACTTGGGGCGGAGGGTACCGACTCCG                              |
| EG7   | TTTGGTCTCAAGGTATTGGCCAATGCAGCAGCCTGACTACG                        |
| EG8   | TTTGGTCTCACTTGCCTGAATCACCACCAGGCCGCCG                            |
| EG45  | <u>GGGACAAGTTTGTACAAAAAAGCAGGCTTCATGAGAGACTCTTCAACA</u> ACTGC    |
| EG46  | <u>GGGGACCACTTTGTACAAGAAAGCTGGGTTCACGATCTTAACGAACCCGGAGC</u>     |
| EG58  | <u>GGGACAAGTTTGTACAAAAAAGCAGGCTTCATGGGTTGGATGCTGTAAAGC</u>       |
| EG59  | <u>GGGGACCACTTTGTACAAGAAAGCTGGGTCTATGTAGTTGCTCCTTTAGGC</u>       |
| EG62  | <u>GGGACAAGTTTGTACAAAAAAGCAGGCTTCATGGCGGTGAAGAAGAAAGTTTCATGG</u> |
| EG63  | <u>GGGACCACTTTGTACAAGAAAGCTGGGTTTAGTACCGTCCCCACCTGCC</u>         |
| EG167 | <u>GGGACAAGTTTGTACAAAAAAGCAGGCTTCATTTTCATCGACCAATTTTCTA</u>      |
| EG168 | <u>GGGACCACTTTGTACAAGAAAGCTGGGTTCAAAGATCATTGAGTATAGAGAC</u>      |

<sup>a</sup> underlined sequences indicate restriction or *att* sites used for cloning purposes.
